# Supplementary material
Source: HighWire-hosted journal article supplement (https://cmajopen.ca/highwire/filestream/81006/field_highwire_adjunct_files/0/open-2016-0051-original-submission.pdf)
Supplement: open-2016-0051-original-submission.pdf [file open-2016-0051-original-submission.pdf]

1  
2  
3 **Sex and Gender Considerations in Canadian Clinical Practice Guidelines: A**  
4 **systematic review**  
5

6  
7 Cara Tannenbaum, MD, MSc<sup>1</sup>, Barbara Clow, PhD<sup>2,3</sup> Margaret Haworth-Brockman,  
8 MSc<sup>4,5</sup> Anita Liu, MSc<sup>1</sup>  
9

10 <sup>1</sup>Canadian Institutes of Health Research, Institute of Gender and Health, Montréal, QC,  
11 Canada

12 <sup>2</sup>Barbara Clow Consulting, Halifax, NS, Canada

13 <sup>3</sup>Faculty of Graduate Studies, Department of History, Dalhousie University, Halifax, NS,  
14 Canada

15 <sup>4</sup>Faculty of Arts, Department of Sociology, University of Winnipeg, Winnipeg, MB,  
16 Canada

17 <sup>5</sup>International Centre for Infectious Diseases, Winnipeg, MB, Canada  
18  
19  
20  
21  
22  
23  
24  
25  
26  
27  
28  
29  
30  
31  
32  
33  
34  
35  
36  
37  
38  
39  
40

41 **Address Correspondence To:**

42 Cara Tannenbaum, MD, MSc  
43 Scientific Director, CIHR Institute of Gender and Health  
44 4545 Queen Mary Road, 3rd floor  
45 Montreal, Quebec, Canada H3W1W5  
46 Email: cara.tannenbaum@umontreal.ca  
47  
48  
49  
50  
51  
52  
53  
54  
55  
56  
57  
58  
59  
60

**Abstract**

*Background:* The importance of sex and gender in the pathophysiology, diagnosis, treatment and outcomes of many chronic health conditions is well established. The extent to which evidence about sex and gender differences is integrated into Canadian clinical practice guidelines (CPGs) remains unknown. We conducted a systematic review to investigate the penetration of sex and gender evidence into Canadian CPGs for selected common chronic diseases.

*Methods:* We searched the Canadian Medical Association Infobase, PubMed, and provincial websites. We included English-language Canadian CPGs published between January 2013 and June 2015. Citations and text were searched electronically using keyword terms related to sex and gender. Two independent reviewers extracted data. Text-positive CPGs were analyzed by health condition for the type, amount, and quality of evidence presented.

*Results:* One hundred fifteen CPGs met the inclusion criteria. Sixty-seven percent (n=77) were text-positive for sex and/or gender. CPGs addressing mental health conditions, stroke, and cardiovascular diseases most frequently cited evidence on sex differences. Analysis of the text-positive CPGs showed variability in the quality of the information. Many mentions of sex and gender were superficial in nature and of little value. The most useful information occurred in the form of actionable evidence-based evaluation and treatment recommendations stating whether care should be applied differently, or with a similar approach, to women/men, girls/boys.

1  
2  
3 *Interpretation:* Evidence on sex differences and gender considerations is inconsistently  
4 reported in CPGs for chronic disease in Canada. A structured approach to ensuring  
5 meaningful inclusion of evidence on sex and gender is needed.  
6  
7  
8  
9  
10  
11  
12  
13  
14  
15  
16  
17  
18  
19  
20  
21  
22  
23  
24  
25  
26  
27  
28  
29  
30  
31  
32  
33  
34  
35  
36  
37  
38  
39  
40  
41  
42  
43  
44  
45  
46  
47  
48  
49  
50  
51  
52  
53  
54  
55  
56  
57  
58  
59  
60

Confidential

**Introduction:**

Gender-responsive healthcare focuses on quality of care for both men and women, taking into account all sex- and gender-related factors (Box 1).[1, 2] Manifestations and outcomes of disease have long been known to differ between men and women, notably in the field of cardiology,[3-6] but also in immune disease,[7, 8] respiratory illness,[8-10] and mental health.[11, 12] A better understanding of molecular, cellular and epigenetic mechanisms underlying these differences has led to a steep rise in the number of sex and gender-specific research publications in all medical disciplines since the 1990s.[13] Despite the wealth of new evidence on sex and gender differences, the uptake of sex and gender research into clinical practice guidelines (CPGs) and clinical practice has been slow, and trails far behind the growth in the medical literature.[14] In the Netherlands, a preliminary study revealed that sex-related factors or effects were mentioned in only 20% of CPG recommendations for osteoporosis and were completely absent in CPGs on depression.[14] Research suggests that failure to integrate sex and gender considerations into CPGs results from lack of awareness and resources.[14-16]

The consequences of omitting sex and gender evidence from CPGs can be severe, ranging from missed opportunities to prevent the onset of Type 2 diabetes in the fathers of children born from mothers with gestational diabetes,[17] to inappropriate prescription of some cardiovascular drugs to women based on altered risk/benefit profiles.[18] An alarming recognition of harm occurred in 2001, when the US General Accounting Office reported that 8 of the 10 prescription drugs withdrawn from the US market by the Food and Drug Administration posed greater health risks for women than for men [19]. Three of these drugs caused potentially fatal Torsades de Pointes ventricular arrhythmias

1  
2  
3 (terfenadine, astemizole and cisapride).[19] In 2014, Health Canada issued a warning to  
4 cut by half the recommended dose of zolpidem for women, a common sleeping pill that  
5 has higher morning blood levels in women and increases the risk of next-day driving  
6 impairment.[20] Men are not exempt from harm. Rochon et al. discovered that in  
7 Ontario, men with dementia who were prescribed antipsychotic drugs had a significantly  
8 higher risk of hospital admission and mortality compared to women.[21] Similarly, social  
9 risk factors are associated with higher rates of suicide in older men, indicating that more  
10 aggressive screening and treatment may be required.[22-24]

11  
12 The development of CPGs is a critical first step for translating research findings  
13 into clinical practice to narrow the “know-do” gap[25, 26] and improve patient care. The  
14 extent to which evidence about sex and gender differences in medicine are integrated into  
15 Canadian CPGs remains unknown. We conducted a systematic review to investigate the  
16 penetration of sex and gender evidence into 2013-2015 Canadian CPGs for common  
17 chronic diseases.  
18  
19  
20  
21  
22  
23  
24  
25  
26  
27  
28  
29  
30  
31  
32  
33  
34  
35  
36  
37  
38  
39  
40

## 41 **Methods:**

### 42 Data sources and inclusion criteria

43 We searched the Canadian Medical Association’s database of CPGs (called the  
44 Infobase)[27] and used the term “clinical practice guideline” to search PubMed and all 13  
45 Canadian provincial/territorial websites for English-language CPGs (Figure 1).

46 According to the CMA’s website, the Infobase includes approximately 1,200 CPGs  
47 developed or endorsed by authoritative medical or health organizations in Canada.[27]

48 Only documents published in Canada within the preceding two years (January 2013 –  
49  
50  
51  
52  
53  
54  
55  
56  
57  
58  
59  
60

1  
2  
3 June 15, 2015) were included. Duplicates were removed. Original research publications,  
4 reviews, opinion pieces, and editorials were excluded. CPGs dealing with single sex  
5 health conditions such as erectile dysfunction, menopause, and prostate or gynecologic  
6 cancers were also excluded.  
7  
8  
9  
10  
11  
12  
13

### 14 CPG selection

15  
16  
17 We strategically selected CPGs addressing chronic health conditions identified as  
18 priorities by policy makers and practitioners, including diabetes, cardiovascular disorders,  
19 specific cancers, mental illness, and pain (Appendix 1)[28, 29, 30-34]  
20  
21  
22  
23  
24  
25  
26

### 27 Data extraction and quality assessment

28  
29 The CPG citations and text were searched electronically using these keywords: “sex”,  
30 “gender”, “male”, “female”, “men”, “women”, “man”, “woman”, “boy”, “girl”. Two  
31 broad categories were created: text-negative for sex and/or gender keywords; text-  
32 positive for sex and/or gender keywords. Risk-of-bias assessments were not performed,  
33 as no validated strategy exists for conducting risk-of-bias assessments for sex and gender  
34 integration into CPGs.  
35  
36  
37  
38  
39  
40  
41  
42  
43  
44  
45

### 46 Data synthesis and analysis

47  
48 CPGs that covered more than one health condition were assigned to the condition that  
49 was most emphasized in the text. Text-positive and text-negative CPGs were treated  
50 separately. Text-positive CPGs were analyzed by health condition for the type, amount,  
51 and quality of evidence presented on epidemiology, risk and screening, pathophysiology,  
52  
53  
54  
55  
56  
57  
58  
59  
60

1  
2  
3 symptoms and diagnosis, and treatment/interventions.[35] Examples of the evidence  
4 included in each of these sections were extracted. As there was significant overlap in  
5 these categories, the data were synthesized qualitatively. CPGs that were text-negative  
6 for sex and/or gender keywords but included citations in the reference lists for research  
7 that addressed sex and/or gender considerations were separated out for further analysis.  
8  
9  
10  
11  
12  
13  
14  
15  
16

### 17 Outcomes

18  
19 The primary outcome of the review was the proportion of CPGs that considered sex  
20 and/or gender, defined as the number of CPGs that were text-positive for sex and/or  
21 gender, over the total number of CPGs included in the review.  
22  
23  
24  
25  
26  
27  
28

### 29 **Results:**

#### 30 *CPG characteristics*

31  
32 A total of 347 Canadian CPGs were identified that addressed one or more of the chronic  
33 diseases under consideration (Figure 1). Thirty CPGs were excluded because they were  
34 published in French: 90% of these were French versions of CPGs already published in  
35 English. Our initial search was not limited by date; a further 194 CPGs were excluded  
36 because they were published in 2012 or earlier. Seven CPGs were excluded because they  
37 addressed sex-specific topics – one for males and six for females. A total of 115 CPGs  
38 comprised the final sample. Table 1 lists the distribution of CPGs by chronic disease.  
39  
40  
41  
42  
43  
44  
45  
46  
47  
48  
49  
50  
51  
52  
53  
54  
55  
56  
57  
58  
59  
60

1  
2  
3  
4  
5  
6  
7  
8  
9  
10  
11  
12  
13  
14  
15  
16  
17  
18  
19  
20  
21  
22  
23  
24  
25  
26  
27  
28  
29  
30  
31  
32  
33  
34  
35  
36  
37  
38  
39  
40  
41  
42  
43  
44  
45  
46  
47  
48  
49  
50  
51  
52  
53  
54  
55  
56  
57  
58  
59  
60

### *Proportion of CPGs integrating sex and/or gender considerations*

Over two-thirds (n=77) of CPGs were text-positive for sex and gender (Table 1). CPGs addressing mental health issues, stroke and cardiovascular diseases were most likely to report evidence on sex differences. Table 2 illustrates the breakdown of sex and gender mentions by epidemiology, risk and screening, pathophysiology, diagnosis and treatment category. Five of the 38 text-negative CPGs included one or more citations to sex-specific evidence or evidence of sex differences. For example, a 2014 CPG on the pharmacological management of chronic neuropathic pain made no reference to sex or gender in the body of the text, but cited two articles on the effects of sustained-action opioids on women and men.[36]

### *Type of evidence cited in the text-positive CPGs*

There was a wide range in the ways text-positive CPGs reported epidemiological data with respect to sex and gender, even for the same disease state. One colorectal cancer CPG stated that “Colorectal cancer is the third most common cancer ...in both sexes, with an estimated 8700 new cases in 2012”. [37] Others provided more precise sex-disaggregated risk and mortality data: “The probability of developing colorectal cancer increases with age and varies with sex ... approximately 1 in 13 men and 1 in 16 women will develop invasive colorectal cancer within their lifetime. Males have a greater chance of dying from colorectal cancer than females, i.e., 1/32 males and 1/36 females will die of invasive colorectal cancer.” [38, 39]



1  
2  
3 Two-thirds of CPGs that mentioned sex as a risk factor did so only in absolute terms,  
4  
5 noting for example that female sex is a risk factor for depression in diabetic patients,[40]  
6  
7 or that adolescent women with Type 1 diabetes are at risk of developing eating  
8  
9 disorders.[41] In rare instances, estimates of the magnitude of the risk difference were  
10  
11 explicitly reported, “Estimates of risk of ischemic stroke in people with diabetes range  
12  
13 from a 2- to 3-fold increase in men and a 2- to 5-fold increase in women.”[42] Sometimes  
14  
15 the comparative risk of different adverse outcomes in men and women were mentioned in  
16  
17 broad terms, such as following stroke, when women are at greater risk of depression  
18  
19 while men are at greater risk of vascular dementia.[43] Gender was recognized as a  
20  
21 modifier of pain perceptions and interpretations of pain.[44]  
22  
23  
24  
25  
26  
27  
28  
29

30 With respect to the pathophysiology of disease and the impact of sex differences on  
31  
32 screening and diagnosis, a CPG on the use of spirometry in asthma noted that women’s  
33  
34 and men’s lungs reach maturity at different ages and that adult males have higher lung  
35  
36 volumes than adult females of the same age and height.[45] Hemoglobin and lipid levels  
37  
38 have different reference values in men and women.[46 ,47] A CPG on colorectal cancer  
39  
40 screening warned that female anatomy has been associated with more adverse events,  
41  
42 longer duration, and incomplete examinations.[48] Making a diagnosis of heart failure in  
43  
44 women is considered to be more difficult, because the cardinal triad of edema, fatigue,  
45  
46 and dyspnea are neither sensitive nor specific manifestations and atypical presentations  
47  
48 occur more frequently.[49]  
49  
50  
51  
52  
53  
54  
55  
56  
57  
58  
59  
60

1  
2  
3 The most useful CPG evidence on sex differences appeared in the form of actionable  
4 items, supported by physiologic data. Such information was found in CPGs on alcohol  
5 consumption that recommended a lower diagnostic screening threshold for risky drinking  
6 behaviour in women compared to men,[50-52] but only one explained biological  
7 differences in alcohol absorption rates by sex.[50] Evidence that women respond more  
8 favourably than men to outpatient care during alcohol withdrawal can reasonably inform  
9 treatment algorithms and resource allocation for the management of alcohol  
10 addiction.[53] Two CPGs on hypertension alluded to hormonal causal pathways for  
11 aggravated hypertension in women, highlighting modifiable treatment strategies in the  
12 form of discontinuation of oral contraceptive and exogenous sex hormone therapies.[54,  
13 55] Recommending the avoidance of antidepressants with strong CYP2D6 inhibition (e.g.  
14 paroxetine, fluoxetine, high-dose sertraline, bupropion) for treatment of depression in  
15 pre-menopausal breast cancer survivors requiring tamoxifen therapy is practical guidance  
16 that clinicians can easily apply.[56] A CPG on heart failure in children and youth warned  
17 that treatment with spironolactone can lead to irreversible gynaecomastia in males.[57]  
18 This piece of information should be shared with patients and their parents, as it could  
19 significantly impact long term psychological outcomes.  
20  
21  
22  
23  
24  
25  
26  
27  
28  
29  
30  
31  
32  
33  
34  
35  
36  
37  
38  
39  
40  
41  
42  
43  
44  
45

46 By comparison, a CPG on childhood diabetes that underscored differences in response to  
47 medication between male and female children and adolescents with type 2 diabetes  
48 without providing details about or explanations for these differences, is of little use to  
49 practitioners during clinical decision-making on the choice of treatment.[41] Similarly,  
50 clinicians are left without guidance from CPGs that described a higher rate of adverse  
51  
52  
53  
54  
55  
56  
57  
58  
59  
60

1  
2  
3 drug effects in women due to use of statins but that offered no assistance for selecting an  
4  
5 alternate lipid lowering therapy.[58-60]  
6  
7  
8  
9

10  
11 CPGs reporting that sex differences are not evident or salient in decisions about care hold  
12 value. One CPG on obesity in adults concluded that there are no differences in outcomes  
13 of interventions based on sex.[61] Two CPGs indicated that the benefits of stroke  
14 rehabilitation are the same for women and men.[62, 63] One CPG on stroke noted that  
15 research on the benefits of carotid endarterectomy in women showed mixed findings. The  
16 CPG cautioned that female sex in isolation is not an exclusion criterion for surgery, but  
17 should be considered as part of the overall risk benefit assessment with specific attention  
18 to co-morbid disease and general health status.[64]  
19  
20  
21  
22  
23  
24  
25  
26  
27  
28  
29  
30  
31  
32

### 33 **Interpretation:**

34  
35 Our review suggests that the uptake of evidence on sex and gender differences is  
36 occurring for a majority of CPGs in Canada. Given historical trends in the early  
37 recognition of sex and gender differences in mental health and cardiovascular diseases, it  
38 is unsurprising that these fields most commonly highlighted sex and gender in their  
39 CPGs[13]. Recent attention to sex differences in oncology,[65-67] lung disease,[8-10]  
40 and diabetes[68-70] explains why there is growth in these latter areas. The degree of  
41 detail and extent to which evidence on sex and gender was incorporated into CPG  
42 sections addressing epidemiology, risk, screening, diagnosis and treatment strategies  
43 varied considerably across health conditions, and within different CPGs for the same  
44 disease. What our review adds is a better understanding of the nature of the integration of  
45  
46  
47  
48  
49  
50  
51  
52  
53  
54  
55  
56  
57  
58  
59  
60

1  
2  
3 sex and gender evidence into Canadian CPGs. Although some CPGs incorporated sex  
4 and gender data in a way that meaningfully guides practice, many of the sex and gender  
5 mentions were superficial and of limited value. The most useful integration occurred  
6 when the data were translated into actionable practice recommendations that directed  
7 care.  
8  
9  
10  
11  
12  
13  
14  
15  
16

17 These findings reflect the paucity of evidence on sex and gender differences in medicine.  
18 Historically, biomedical investigators conducted basic science experiments  
19 predominantly on male animals, and women were underrepresented in clinical trials.[71,  
20 72] Although rates of publication are rising, in 2010 less than 25% addressed differences  
21 in management decisions for patients based on sex or gender.[13] Another explanation  
22 for the suboptimal integration of sex and gender evidence into CPGs relates to the long  
23 lag-time between research discovery and practice transformation.[73, 74] We now know  
24 that microglial cells play a role in mediating pain pathways in males, and T-cells are  
25 likely responsible for this same function in females.[75] When and how this information  
26 will translate into different analgesic drug targets for men and women remains unknown.  
27 Pharmaco-epidemiological findings and post-marketing drug safety warnings on the  
28 differential risk of adverse drug reactions in men and women do not seem to dramatically  
29 change prescribing patterns that are firmly entrenched in routine practice care.[76] It will  
30 be interesting to see whether a future CPG on insomnia incorporates Health Canada's  
31 2014 recommendation to cut the dose of sleeping pills in half for women.[20] Finally, a  
32 standard method for synthesizing sex and gender evidence to help answer key questions  
33 framing the development of a CPG is lacking.[77] Unless a CPG working group  
34  
35  
36  
37  
38  
39  
40  
41  
42  
43  
44  
45  
46  
47  
48  
49  
50  
51  
52  
53  
54  
55  
56  
57  
58  
59  
60

1  
2  
3 specifically asks a question about whether the evidence differs by sex or gender, it is  
4  
5 unlikely that the correct search terms will be used to query the evidence. Sex and gender  
6  
7 interact, but represent distinct concepts that can affect health recommendations (Box 1).  
8  
9 Without a clear understanding of sex and gender effects in medicine, and how these  
10  
11 factors should be incorporated into recommendations, CPG working group members may  
12  
13 miss opportunities to appropriately influence clinical care.  
14  
15  
16  
17  
18  
19

20 A strength of our systematic review is that Canadian, provincial, and academic web  
21  
22 sources were all used to search for CPGs. The search terms related to sex and gender  
23  
24 were broad and inclusive. However, our findings may overestimate the meaningful  
25  
26 integration of sex and gender evidence into Canadian CPGs, as mentions of sex and  
27  
28 gender in text-positive CPGs were frequently superficial and of limited value. We did not  
29  
30 systematically search for sex and gender evidence that was omitted from CPGs, so could  
31  
32 not gauge the quality or comprehensiveness of the choice of data to include in the text-  
33  
34 positive and text-negative CPGs. The fact that five text-negative CPGs cited references  
35  
36 that alluded to sex differences, suggests that omission, rather than lack of evidence *per*  
37  
38 *se*, may have occurred in certain circumstances.  
39  
40  
41  
42  
43  
44  
45

46 The implications of this systematic review on future CPG development are two-fold.  
47  
48 First, guidelines and handbooks for developing CPGs could be revised to emphasize the  
49  
50 importance of including sub-questions and search terms aimed at revealing existing and  
51  
52 emerging evidence on sex and gender differences in medicine. Second, a focus on  
53  
54 gender-responsive interventions should be prioritized not only in CPGs, but also in  
55  
56  
57  
58  
59  
60

1  
2  
3  
4  
5  
6  
7  
8  
9  
10  
11  
12  
13  
14  
15  
16  
17  
18  
19  
20  
21  
22  
23  
24  
25  
26  
27  
28  
29  
30  
31  
32  
33  
34  
35  
36  
37  
38  
39  
40  
41  
42  
43  
44  
45  
46  
47  
48  
49  
50  
51  
52  
53  
54  
55  
56  
57  
58  
59  
60

medical school curricula and continuing medical education resources to consolidate  
Canadian innovation in personalized care.

Confidential

## References

1. Legato MJ. Beyond women's health the new discipline of gender-specific medicine. *Med Clin North Am* 2003; 87 (5): 917-937.
2. Health Canada. Health Portfolio Sex- and Gender-based Analysis Policy. 2010; Available at: <http://www.hc-sc.gc.ca/hl-vs/pubs/women-femmes/sgba-policy-politique-ags-eng.php>. Accessed 06/30, 2015.
3. Koeth O, Zahn R, Heer T, Bauer T, et al. Gender differences in patients with acute ST-elevation myocardial infarction complicated by cardiogenic shock. *Clinical research in cardiology* 2009; 98 (12):781-786.
4. Letsas KP, Efremidis M, Kounas SP, et al. Clinical characteristics of patients with drug-induced QT interval prolongation and torsade de pointes: identification of risk factors. *Clinical research in cardiology* 2009; 98 (4):208-212.
5. Nieminen MS, Harjola V, Hochadel M, et al. Gender related differences in patients presenting with acute heart failure. Results from EuroHeart Failure Survey II. *European Journal of Heart Failure* 2008;10(2):140-148.
6. Schirmer SH, Hohl M, Bohm M. Gender differences in heart failure: paving the way towards personalized medicine? *Eur Heart J* 2010; 31(10):1165-1167.
7. Rubtsova K, Marrack P, Rubtsov AV. Sexual dimorphism in autoimmunity. *J Clin Invest* 2015;125 (6):2187-2193.
8. Giefing - Kröll C, Berger P, Lepperdinger G, et al. How sex and age affect immune responses, susceptibility to infections, and response to vaccination. *Aging Cell* 2015; 14 (3):309-321.

- 1  
2  
3 9. Casimir GJ, Lefèvre N, Corazza F, et al. Sex and inflammation in respiratory  
4  
5 diseases: a clinical viewpoint. *Biol Sex Differ* 2013; 4 (1):16.  
6  
7
- 8 10. Robles PG, Brooks D, Goldstein R, et al. Gender-associated differences in  
9  
10 pulmonary rehabilitation outcomes in people with chronic obstructive pulmonary  
11  
12 disease: a systematic review. *J Cardiopulm Rehabil Prev* 2014; 34 (2):87-97.  
13  
14
- 15 11. Hill TD, Needham BL. Rethinking gender and mental health: A critical analysis of  
16  
17 three propositions. *Soc Sci Med* 2013; 92:83-91.  
18  
19
- 20 12. Seedat S, Scott KM, Angermeyer MC, et al. Cross-national associations between  
21  
22 gender and mental disorders in the World Health Organization World Mental Health  
23  
24 Surveys. *Arch Gen Psychiatry* 2009; 66 (7):785-795.  
25  
26
- 27 13. Oertelt-Prigione S, Parol R, Krohn S, et al.. Analysis of sex and gender-specific  
28  
29 research reveals a common increase in publications and marked differences between  
30  
31 disciplines. *BMC Med* 2010; 8: 70-79.  
32  
33
- 34 14. Keuken D, Haafkens J, Moerman C, et al. Attention to sex-related factors in the  
35  
36 development of clinical practice guidelines. *Journal of Women's Health* 2007; 16  
37  
38 (1):82-92.  
39  
40
- 41 15. Keuken DG, Haafkens JA, Mohrs J, et al. Evaluating the effectiveness of an  
42  
43 educational and feedback intervention aimed at improving consideration of sex  
44  
45 differences in guideline development. *Qual Saf Health Care* 2010; 19 (6):e18.  
46  
47
- 48 16. Keuken D, Bindels P, Klazinga N, et al. A systematic approach for uptake of  
49  
50 evidence on sex - specific issues in guidelines-a pilot study. *J Eval Clin Pract* 2012;  
51  
52 18 (2):369-377.  
53  
54  
55  
56  
57  
58  
59  
60



- 1  
2  
3 17. Dasgupta K, Ross N, Meltzer S, et al. Gestational Diabetes Mellitus in Mothers as a  
4  
5 Diabetes Predictor in Fathers: A Retrospective Cohort Analysis. *Diabetes Care*  
6  
7 2015; 38 (9): e130-e131.  
8  
9
- 10 18. Stolarz AJ, Rusch NJ. Gender Differences in Cardiovascular Drugs. *Cardiovascular*  
11  
12 *Drugs and Therapy* 2015; 29 (4):403-410.  
13  
14
- 15 19. United States General Accounting Office. Drugs Withdrawn From Market Report  
16  
17 GAO-01-286R. Available at: <http://www.gao.gov/new.items/d01286r.pdf>. Accessed  
18  
19 08/14, 2015.  
20  
21
- 22 20. Government of Canada. Healthy Canadians Recalls and Alerts: Sublinox (zolpidem  
23  
24 tartrate) - New Dosage Recommendations to Minimize Risk of Next-Day  
25  
26 Impairment in Both Women and Men - For Health Professionals. Available at:  
27  
28 <http://healthycanadians.gc.ca/recall-alert-rappel-avis/hc-sc/2014/37415a-eng.php>.  
29  
30 Accessed 08/14, 2015.  
31  
32
- 33 21. Rochon PA, Gruneir A, Gill SS, et al. Older men with dementia are at greater risk  
34  
35 than women of serious events after initiating antipsychotic therapy. *J Am Geriatr Soc*  
36  
37 2013; 61 (1):55-61.  
38  
39
- 40 22. Eggertson L. Canada lacks national suicide prevention strategy. *Lancet* 2015;385  
41  
42 (9987):2562-2563.  
43  
44
- 45 23. Murphy BJ, Bugeja L, Pilgrim J, et al.. Completed suicide among nursing home  
46  
47 residents: a systematic review. *Int J Geriatr Psychiatry* 2015; 30 (8):802-814.  
48  
49
- 50 24. Schiff LB, Holland KM, Stone DM, et al. Acute and Chronic Risk Preceding  
51  
52 Suicidal Crises Among Middle-Aged Men Without Known Mental Health and/or  
53  
54 Substance Abuse Problems. *Crisis* 2015; 30:1-12.  
55  
56  
57  
58  
59  
60

- 1  
2  
3  
4  
5  
6  
7  
8  
9  
10  
11  
12  
13  
14  
15  
16  
17  
18  
19  
20  
21  
22  
23  
24  
25  
26  
27  
28  
29  
30  
31  
32  
33  
34  
35  
36  
37  
38  
39  
40  
41  
42  
43  
44  
45  
46  
47  
48  
49  
50  
51  
52  
53  
54  
55  
56  
57  
58  
59  
60
25. Pablos-Mendez A, Shademani R. Knowledge translation in global health. *J Contin Educ Health Prof* 2006 ; 26 (1):81-86.
  26. Green LW, Ottoson JM, García C, et al. Diffusion Theory and Knowledge Dissemination, Utilization, and Integration in Public Health. *Annu Rev Public Health* 2014; 30 (1):151-174.
  27. Canadian Medical Association. CMA Infobase: Clinical Practice Guidelines Database. 2015; Available at: <https://www.cma.ca/En/Pages/clinical-practice-guidelines.aspx>. Accessed 04/26, 2015.
  28. Terner M, Reason B, McKeag AM, et al. Chronic Conditions More Than Age Drive Health System Use in Canadian Seniors *Healthcare Quarterly* 2011; 14 (3):19-22.
  29. Public Health Agency of Canada. Preventing Chronic Disease Strategy, 2013-2016. 2013; Available at: <http://www.phac-aspc.gc.ca/cd-mc/index-eng.php>. Accessed 04/25, 2015.
  30. Mental Health Commission of Canada. Changing Directions: Changing Lives: The Mental Health Strategy for Canada. 2013; Available at: <http://www.mentalhealthcommission.ca>. Accessed 04/26, 20165.
  31. Government of Nova Scotia. Together We Can: The plan to improve mental health and addictions care for Nova Scotians. 2012; Available at: <http://novascotia.ca/dhw/mental-health/mental-health-addiction-strategy.asp>. Accessed 06/05, 2015.
  32. Government of Manitoba. Rising to the Challenge: A strategic plan for the mental health and well-being of Manitobans. 2011; Available at: <http://www.gov.mb.ca/healthyliving/mh/challenge.html>. Accessed 06/05, 2015.

- 1  
2  
3  
4  
5  
6  
7  
8  
9  
10  
11  
12  
13  
14  
15  
16  
17  
18  
19  
20  
21  
22  
23  
24  
25  
26  
27  
28  
29  
30  
31  
32  
33  
34  
35  
36  
37  
38  
39  
40  
41  
42  
43  
44  
45  
46  
47  
48  
49  
50  
51  
52  
53  
54  
55  
56  
57  
58  
59  
60
33. Lynch ME. The need for a Canadian pain strategy. *Pain Research & Management : The Journal of the Canadian Pain Society* 2011;16 (2):77-80.
34. Action Ontario. The Need for the Comprehensive Pain Strategy in Ontario. n.d.; Available at: [http://www.actionontario.ca/en/issues\\_and\\_advocacy/issues/need\\_for\\_comprehensive\\_pain\\_strategy.html](http://www.actionontario.ca/en/issues_and_advocacy/issues/need_for_comprehensive_pain_strategy.html). Accessed 06/05, 2015.
35. Keuken D, Haafkens JA, Hellema MJ, et al. Incorporating a gender perspective into the development of clinical guidelines: a training course for guideline developers *Implementation Science* 2007; 2 (35).
36. Moulin D, Boulanger A, Clark AJ, et al. Pharmacological management of chronic neuropathic pain: revised consensus statement from the Canadian Pain Society. *Pain Res Manag* 2014; 19 (6):328-335.
37. Asmis T, Berry S, Cosby R, et al. Strategies of sequential therapies in unresectable metastatic colorectal cancer: a meta-analysis. *Current Oncology* 2014; 21 (6):318.
38. Toward Optimized Practice Working Group for Colorectal Cancer Screening. *Colorectal Cancer Screening: Clinical Practice Guideline*. Edmonton, AB: Toward Optimized Practice; 2013. Available at: [http://www.topalbertadoctors.org/download/1009/colorectal\\_guideline.pdf](http://www.topalbertadoctors.org/download/1009/colorectal_guideline.pdf). Accessed 06/05, 2015.
39. British Columbia Ministry of Health. *Colorectal Screening for Cancer Prevention in Asymptomatic Patients*. 2013. Available at: [http://www2.gov.bc.ca/assets/gov/health/practitioner-pro/bc-guidelines/colorectal\\_screening.pdf](http://www2.gov.bc.ca/assets/gov/health/practitioner-pro/bc-guidelines/colorectal_screening.pdf). Accessed 06/07, 2015.

- 1  
2  
3  
4  
5  
6  
7  
8  
9  
10  
11  
12  
13  
14  
15  
16  
17  
18  
19  
20  
21  
22  
23  
24  
25  
26  
27  
28  
29  
30  
31  
32  
33  
34  
35  
36  
37  
38  
39  
40  
41  
42  
43  
44  
45  
46  
47  
48  
49  
50  
51  
52  
53  
54  
55  
56  
57  
58  
59  
60
40. Robinson DJ, Luthra M, Vallis M. Diabetes and mental health. *Canadian Journal of Diabetes* 2013;37:S87-S92.
41. Panagiotopoulos C, Riddell MC, Sellers EA, Canadian Diabetes Association Clinical Practice Guidelines Expert Committee. Type 2 diabetes in children and adolescents. *Canadian Journal of Diabetes* 2013; 37: S163-S167.
42. Sharma M, Gubitz GJ. Management of Stroke in Diabetes. *Canadian Journal of Diabetes* 2013(37):S124-S125.
43. Eskes G. Mood and Cognition in Patients Following Stroke. In: Lindsay MP, Gubitz G, Bayley, M., Phillips, S., the Canadian Stroke Best Practices and Standards Working Group, editors. *Canadian Best Practice Recommendations for Stroke Care*. 4th ed.; 2013. p. 1-40.
44. Registered Nurses' Association of Ontario. *Assessment and Management of Pain*. 3rd ed. Toronto, ON: Registered Nurses' Association of Ontario; 2013.
45. Coates AL, Graham BL, McFadden RG, et al. Spirometry in primary care. *Can Respir J* 2013; 20 (1):13-21.
46. Tobe SW, Stone JA, Walker KM, et al. Canadian Cardiovascular Harmonized National Guidelines Endeavour (C-CHANGE): 2014 update. *CMAJ* 2014;186 (17):1299-1305.
47. Moe GW, Ezekowitz JA, O'Meara E, et al. The 2014 Canadian Cardiovascular Society heart failure management guidelines focus update: anemia, biomarkers, and recent therapeutic trial implications. *Can J Cardiol* 2015; 31 (1):3-16.

- 1  
2  
3  
4  
5  
6  
7  
8  
9  
10  
11  
12  
13  
14  
15  
16  
17  
18  
19  
20  
21  
22  
23  
24  
25  
26  
27  
28  
29  
30  
31  
32  
33  
34  
35  
36  
37  
38  
39  
40  
41  
42  
43  
44  
45  
46  
47  
48  
49  
50  
51  
52  
53  
54  
55  
56  
57  
58  
59  
60
48. Tinmouth J, Kennedy EB, Baron D, et al. Colonoscopy quality assurance in Ontario: Systematic review and clinical practice guideline. *Can J Gastroenterol Hepatol* 2014; 28 (5):251-274.
  49. McKelvie RS, Moe GW, Ezekowitz JA, et al. The 2012 Canadian Cardiovascular Society heart failure management guidelines update: focus on acute and chronic heart failure. *Can J Cardiol* 2013; 29 (2):168-181.
  50. Collège des médecins du Québec and Éduc'alcool. Low-risk drinking guidelines : a guide for physicians and health care professionals. 2013. Available at: <http://www.cmq.org/en/MedecinsMembres/Profil/Commun/AProposOrdre/Publications/~media/Files/Guides/Guide-alcool-faible-risque-angl.pdf?41322>. Accessed 06/07, 2015
  51. British Columbia Ministry of Health. Problem Drinking Part 1: Screening and Assessment. 2013. Available at: <http://www.cmq.org/en/MedecinsMembres/Profil/Commun/AProposOrdre/Publications/~media/Files/Guides/Guide-alcool-faible-risque-angl.pdf?41322>. Accessed 06/01, 2015
  52. British Columbia Ministry of Health. Problem Drinking Part 2: Brief Intervention. 2013. Available at: <http://www.cmq.org/en/MedecinsMembres/Profil/Commun/AProposOrdre/Publications/~media/Files/Guides/Guide-alcool-faible-risque-angl.pdf?41322>. Accessed 06/01, 2015
  53. British Columbia Ministry of Health. Problem Drinking Part 3: Office Management (i.e., non-admission). 2013. Available at:

- 1  
2  
3 [http://www.cmq.org/en/MedecinsMembres/Profil/Commun/AProposOrdre/Publicati](http://www.cmq.org/en/MedecinsMembres/Profil/Commun/AProposOrdre/Publications/~media/Files/Guides/Guide-alcool-faible-risque-angl.pdf?41322)  
4 <ons/~media/Files/Guides/Guide-alcool-faible-risque-angl.pdf?41322>. Accessed  
5  
6 06/01, 2015.  
7  
8  
9  
10 54. Canadian Hypertension Education Program. 2014 Recommendations. Available at:  
11 [http://www.hypertension.ca/images/CHEP\\_2014/2014\\_CompleteCHEPRecommend](http://www.hypertension.ca/images/CHEP_2014/2014_CompleteCHEPRecommendations_EN_HCP1009.pdf)  
12 [ations\\_EN\\_HCP1009.pdf](ations_EN_HCP1009.pdf). Accessed: 05/30, 2015.  
13  
14  
15 55. Canadian Hypertension Education Program. Canadian 2013 Recommendations.  
16 2013. Available at:  
17 [http://hypertension.ca/images/CHEP\\_2013/2013\\_CompleteCHEPRecommendations](http://hypertension.ca/images/CHEP_2013/2013_CompleteCHEPRecommendations_EN_HCP1009.pdf)  
18 [\\_EN\\_HCP1009.pdf](#). Accessed: 05/30, 201.  
19  
20  
21  
22  
23  
24  
25 56. Li M, Kennedy EB, Byrne N, et al. The Management of Depression in Patients with  
26 Cancer. 2015; Evidence-Based Series #19-4. Available at:  
27 <https://www.cancercare.on.ca/common/pages/UserFile.aspx?fileId=340750> Accessed  
28 [https://www.cancercare.on.ca/common/pages/UserFile.aspx?fileId=340750](#) Accessed  
29 06/15, 2015.  
30  
31  
32  
33  
34  
35 57. Kantor PF, Loughheed J, Dancea A, et al. Presentation, diagnosis, and medical  
36 management of heart failure in children: Canadian Cardiovascular Society  
37 guidelines. *Can J Cardiol* 2013; 29 (12):1535-1552.  
38  
39  
40  
41  
42  
43 58. British Columbia Ministry of Health. Cardiovascular Disease – Primary Prevention.  
44 2014. Available at: [http://www2.gov.bc.ca/assets/gov/health/practitioner-pro/bc-](http://www2.gov.bc.ca/assets/gov/health/practitioner-pro/bc-guidelines/cvd.pdf)  
45 [guidelines/cvd.pdf](http://www2.gov.bc.ca/assets/gov/health/practitioner-pro/bc-guidelines/cvd.pdf). Accessed: 05/28, 2015  
46  
47  
48  
49  
50 59. Mancini GJ, Tashakkor AY, Baker S, et al. Diagnosis, prevention, and management  
51 of statin adverse effects and intolerance: Canadian Working Group Consensus  
52 update. *Can J Cardiol* 2013; 29 (12):1553-1568.  
53  
54  
55  
56  
57  
58  
59  
60

- 1  
2  
3  
4  
5  
6  
7  
8  
9  
10  
11  
12  
13  
14  
15  
16  
17  
18  
19  
20  
21  
22  
23  
24  
25  
26  
27  
28  
29  
30  
31  
32  
33  
34  
35  
36  
37  
38  
39  
40  
41  
42  
43  
44  
45  
46  
47  
48  
49  
50  
51  
52  
53  
54  
55  
56  
57  
58  
59  
60
60. Mancini J, Hegele RA, Leitner LA. Dyslipidemia. *Canadian Journal of Diabetes* 2013;37:S110-S116.
  61. Brauer P, Connor Gorber S, Shaw E, et al. Recommendations for prevention of weight gain and use of behavioural and pharmacologic interventions to manage overweight and obesity in adults in primary care. *CMAJ* 2015;187 (3):184-195.
  62. Dawson AS, Knox J, McClure A, et al. Stroke Rehabilitation. In: Lindsay MP, Gubitz G, Bayley M, et al. editors. *Canadian Best Practice Recommendations for Stroke Care*. 4th ed.; 2013. p. 1-97.
  63. Casaubon LK, Suddes M. Acute Inpatient Stroke Care. In: Lindsay MP, Gubitz G, Bayley M, et al. editors. *Canadian Best Practice Recommendations for Stroke Care*. 4th ed.; 2013; p. 1-40.
  64. Lindsay MP, Gubitz G, Bayley M, et al. Summary of stroke best practice recommendations 2012 – 2013 update. In: Lindsay MP, Gubitz G, Bayley M, et al, editors. *Canadian Best Practice Recommendations for Stroke Care*. 4th ed.; 2013. p. 13-81.
  65. Hoyt MA, Rubin LR. Gender representation of cancer patients in medical treatment and psychosocial survivorship research. *Cancer* 2012; 118 (19):4824-4832.
  66. Kim S, Paik HY, Yoon H, et al. Sex-and gender-specific disparities in colorectal cancer risk. *World journal of gastroenterology: WJG* 2015; 21 (17):5167.
  67. Kunath F, Keck B, Bertz S, et al. Is gender becoming relevant in uro-oncological research? A bibliographical analysis. *World J Urol* 2013; 31 (5):1065-1072.

- 1  
2  
3  
4  
5  
6  
7  
8  
9  
10  
11  
12  
13  
14  
15  
16  
17  
18  
19  
20  
21  
22  
23  
24  
25  
26  
27  
28  
29  
30  
31  
32  
33  
34  
35  
36  
37  
38  
39  
40  
41  
42  
43  
44  
45  
46  
47  
48  
49  
50  
51  
52  
53  
54  
55  
56  
57  
58  
59  
60
68. Arnetz L, Ekberg NR, Alvarsson M. Sex differences in type 2 diabetes: focus on disease course and outcomes. *Diabetes, metabolic syndrome and obesity: targets and therapy* 2014;7: 409-420.
69. Franconi F, Campesi I, Occhioni S, et al. Sex-gender differences in diabetes vascular complications and treatment. *Endocrine, Metabolic & Immune Disorders-Drug Targets* 2012;12 (2):179-196.
70. Franconi F, Campesi I. Sex and gender influences on pharmacological response: an overview. *Expert review of clinical pharmacology* 2014; 7 (4):469-485.
71. Clayton JA, Collins FS. NIH to balance sex in cell and animal studies. *Nature* 2014; 509 (7500):282-283.
72. Johnson J, Sharman Z, Vissandjee B, et al. Does a change in health research funding policy related to the integration of sex and gender have an impact? *PLoS ONE* 2014; 9 (6): e99900.
73. Morris ZS, Wooding S, Grant J. The answer is 17 years, what is the question: understanding time lags in translational research. *J R Soc Med* 2011;104 (12):510-520.
74. Hanney SR, Castle-Clarke S, Grant J, et al. How long does biomedical research take? Studying the time taken between biomedical and health research and its translation into products, policy, and practice. *Health Res Policy Syst* 2015;13 (1).
75. Sorge RE, Mapplebeck JC, Rosen S, et al. Different immune cells mediate mechanical pain hypersensitivity in male and female mice. *Nat Neurosci* 2015; 18: 1081-1083.



- 1  
2  
3  
4  
5  
6  
7  
8  
9  
10  
11  
12  
13  
14  
15  
16  
17  
18  
19  
20  
21  
22  
23  
24  
25  
26  
27  
28  
29  
30  
31  
32  
33  
34  
35  
36  
37  
38  
39  
40  
41  
42  
43  
44  
45  
46  
47  
48  
49  
50  
51  
52  
53  
54  
55  
56  
57  
58  
59  
60
76. Valiyeva E, Herrmann N, Rochon PA, Gill SS, Anderson GM. Effect of regulatory warnings on antipsychotic prescription rates among elderly patients with dementia: a population-based time-series analysis. *CMAJ*;179 (5):438-446.
77. Canadian Medical Association. Handbook on clinical practice guidelines. 2007. Available at: <https://www.cma.ca/Assets/assets-library/document/en/clinical-resources/CPG%20handbook-e.pdf>. Accessed 04/26, 2015.

Confidential

1  
2  
3 **Box 1: Sex and Gender**  
4

5  
6  
7 “Sex” refers to the biological and physiological characteristics that distinguish males and  
8 females in any species, including humans.  
9

10  
11  
12 “Gender” consists of the socially constructed roles and relationships, personality traits,  
13 attitudes, behaviours, values, relative power and influence that society ascribes to the two  
14 sexes.  
15

16  
17  
18 Sex and gender are understood to be not strictly binary (i.e., there are continua between  
19 “female” and “male”)  
20

21  
22  
23 The influence of “sex” and “gender” can overlap and intersect, affecting health and well-  
24 being.  
25  
26  
27  
28  
29  
30  
31  
32  
33  
34  
35  
36  
37  
38  
39  
40  
41  
42  
43  
44  
45  
46  
47  
48  
49  
50  
51  
52  
53  
54  
55  
56  
57  
58  
59  
60

Confidential

Figure 1. Inclusion and exclusion of clinical practice guidelines (CPGs) in review

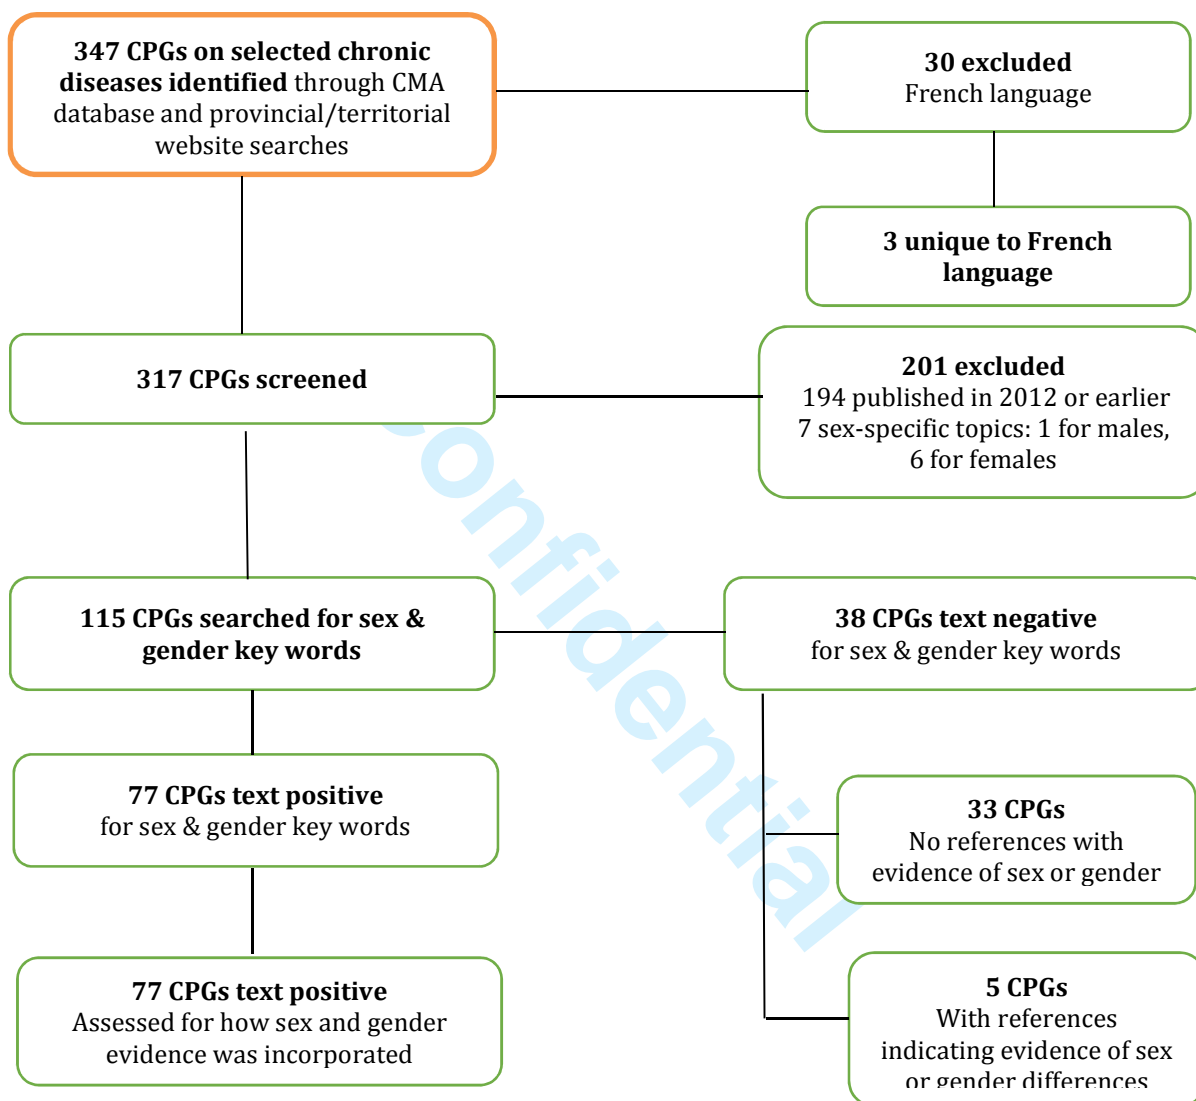

**Table 1: Number and proportion of text-negative and text-positive CPGs by chronic health condition**

| Health Condition                 | Text-positive |      | Text-negative |      |
|----------------------------------|---------------|------|---------------|------|
|                                  | n             | %    | n             | %    |
| Cardiovascular Diseases          | 24            | 70.5 | 10            | 29.4 |
| Diabetes                         | 18            | 52.9 | 15            | 47.1 |
| Mental Illness and Substance Use | 12            | 92.3 | 2             | 7.6  |
| Cancer                           | 8             | 57.1 | 6             | 42.9 |
| Stroke                           | 8             | 88.9 | 1             | 11.1 |
| Obesity                          | 3             | 100  | 0             | 0    |
| Pain                             | 3             | 50.0 | 3             | 50.0 |
| Asthma                           | 1             | 50.0 | 1             | 50.0 |
| Total                            | 77            |      | 38            |      |

**Table 2. Number and proportion of text-positive CPGs by subject**

|                             | <b>Number</b> | <b>Percentage</b> |
|-----------------------------|---------------|-------------------|
| Risk and Screening          | 32            | 41.5              |
| Treatment and Interventions | 24            | 31.2              |
| Pathophysiology             | 23            | 29.8              |
| Epidemiology and Prevalence | 19            | 24.6              |
| Symptoms and Diagnosis      | 13            | 16.9              |

Confidential

## Appendix 1

| <b>Final list of health conditions (and sub-conditions) searched for CPGs</b> |                              |
|-------------------------------------------------------------------------------|------------------------------|
| Health condition                                                              | Sub-conditions               |
| Asthma                                                                        | Asthma                       |
| Cancer                                                                        | Cancer, colorectal           |
|                                                                               | Cancer, general              |
|                                                                               | Cancer, lung                 |
|                                                                               | Polyps                       |
| Cardiovascular Diseases                                                       | Acute coronary syndrome      |
|                                                                               | Angina pectoris              |
|                                                                               | Atrial fibrillation          |
|                                                                               | Cardiomyopathies             |
|                                                                               | Cardiovascular diseases      |
|                                                                               | COPD                         |
|                                                                               | Coronary artery disease      |
|                                                                               | Dyslipidemias                |
|                                                                               | Heart failure                |
|                                                                               | Hypertension                 |
|                                                                               | Myocardial ischemia          |
|                                                                               | Pulmonary embolism           |
|                                                                               | Pulmonary hypertension       |
|                                                                               | Thrombosis                   |
| Venous thromboembolism                                                        |                              |
| Diabetes                                                                      | Diabetes                     |
|                                                                               | Diabetic nephropathies       |
|                                                                               | Diabetic retinopathy         |
| Mental illness and substance use                                              | Addictions                   |
|                                                                               | Alcohol drinking             |
|                                                                               | Anxiety disorders            |
|                                                                               | Dementia                     |
|                                                                               | Depression                   |
|                                                                               | Generalized anxiety disorder |
|                                                                               | Insomnia                     |
|                                                                               | Mental health                |
|                                                                               | Substance dependence         |
| Obesity                                                                       | Obesity                      |
| Pain                                                                          | Back pain                    |
|                                                                               | Fibromyalgia                 |
|                                                                               | Migraine                     |
|                                                                               | Neuralgia                    |
|                                                                               | Osteoarthritis               |
|                                                                               | Pain                         |
| Stroke                                                                        | Stroke                       |
|                                                                               | Peripheral vascular disease  |
|                                                                               | Transient ischemic attacks   |
